# Supplementary material for: Planting Systems Affect Soil Microbial Communities and Enzymes Activities Differentially under Drought and Phosphorus Addition
Source: MDPI journal article supplement (doi:10.3390/plants11030319), 2022-01-25
Supplement: s1 [file s1]

# Planting systems affects soil microbial communities and enzymes activities differentially under drought and phosphorus addition

Olusanya Abiodun OLATUNJI <sup>1,2\*</sup>, Kaiwen PAN <sup>2\*\*</sup>, Akash TARIQ<sup>2,3</sup>, Gideon Olarewaju OKUNLOLA<sup>1</sup>, Dong WANG <sup>4</sup>, Idris Olawale RAIMI<sup>5</sup>, Lin ZHANG<sup>2</sup>

<sup>1</sup>Department of Plant Biology, Faculty of Basic and Applied Sciences, Osun State University, Osogbo, Nigeria.

<sup>2</sup>CAS Key Laboratory of Mountain Ecological Restoration and Bioresource Utilization & Ecological Restoration Biodiversity Conservation Key Laboratory of Sichuan Province, Chengdu Institute of Biology, Chinese Academy of Sciences, Chengdu 610041, People's Republic of China.

<sup>3</sup> Xinjiang Key Laboratory of Desert Plant Roots Ecology and Vegetation Restoration, Xinjiang Institute of Ecology and Geography, Chinese Academy of Sciences, Urumqi 830011, China.

<sup>4</sup> College of Environmental Science and Engineering, China West Normal University, Nanchong 637000, China

<sup>5</sup> Department of Biology, Sefako Makgatho Health Sciences University, Pretoria, South Africa.

\* Corresponding author

E-mail address: [\\*olusanya084@yahoo.ca](mailto:olusanya084@yahoo.ca), [\\*\\* pankw@cib.ac.cn](mailto:pankw@cib.ac.cn) (K. Pan)

Table S1: The interactive effects of planting systems, phosphorus (P) addition and water treatment on the soil chemical properties variables.

| Effects                                | NO <sub>3</sub> <sup>-</sup> -N |              | DON |              | DOC  |                  | SM   |                  | aP    |                  |
|----------------------------------------|---------------------------------|--------------|-----|--------------|------|------------------|------|------------------|-------|------------------|
|                                        | F                               | P            | F   | P            | F    | P                | F    | P                | F     | P                |
| PS                                     | 6.7                             | <b>0.003</b> | 2.4 | 0.10         | 12.5 | <b>&lt;0.001</b> | 0.49 | 0.61             | 30.4  | <b>&lt;0.001</b> |
| WT <sub>t</sub>                        | 3.2                             | 0.07         | 8.0 | <b>0.007</b> | 15.1 | <b>&lt;0.001</b> | 31.8 | <b>&lt;0.001</b> | 0.12  | 0.72             |
| PT <sub>t</sub>                        | 0.04                            | 0.83         | 0.9 | 0.34         | 7.1  | <b>0.02</b>      | 0.08 | 0.77             | 161.6 | <b>&lt;0.001</b> |
| PS * WT <sub>t</sub>                   | 1.9                             | 0.14         | 7.1 | <b>0.002</b> | 18.6 | <b>&lt;0.001</b> | 0.19 | 0.82             | 7.6   | <b>0.001</b>     |
| PS * PT <sub>t</sub>                   | 0.9                             | 0.37         | 8.7 | <b>0.001</b> | 38.0 | <b>&lt;0.001</b> | 0.62 | 0.53             | 8.51  | <b>0.02</b>      |
| WT <sub>t</sub> * PT <sub>t</sub>      | 0.1                             | 0.97         | 4.3 | <b>0.04</b>  | 11.9 | <b>0.001</b>     | 2.4  | 0.12             | 1.9   | 0.16             |
| PS * WT <sub>t</sub> * PT <sub>t</sub> | 2.1                             | 0.13         | 0.9 | 0.38         | 17.4 | <b>&lt;0.001</b> | 0.95 | 0.39             | 4.1   | <b>0.02</b>      |

Statistically significant ( $p < 0.05$ ) results are shown in boldface (n = 5). PS: planting systems; WT<sub>t</sub>: Water treatments and PT<sub>t</sub>: Phosphorus addition. SM: soil moisture (%); DOC: dissolved organic carbon (mg/kg); DON: dissolved organic nitrogen (mg/kg); NO<sub>3</sub><sup>-</sup>-N: soil nitrate nitrogen(mg/g) and aP: Available phosphorus (mg P kg<sup>-1</sup>soil).

Table S2: Summary of three-way ANOVA investigating the effects of planting systems, water treatments, phosphorus addition and their interaction on soil microbial biomass

| Effects                                     | MBP  |                  | MBN  |                  | MBC  |                  |
|---------------------------------------------|------|------------------|------|------------------|------|------------------|
|                                             | F    | P                | F    | P                | F    | P                |
| <b>PS</b>                                   | 3.02 | <b>0.05</b>      | 11.8 | <b>&lt;0.001</b> | 8.8  | <b>0.001</b>     |
| <b>WT<sub>t</sub></b>                       | 13.9 | <b>0.001</b>     | 0.02 | 0.90             | 14.8 | <b>&lt;0.001</b> |
| <b>PT<sub>t</sub></b>                       | 18.7 | <b>&lt;0.001</b> | 0.26 | 0.61             | 9.7  | <b>0.003</b>     |
| <b>PS * WT<sub>s</sub></b>                  | 14.1 | <b>&lt;0.001</b> | 0.79 | 0.45             | 0.93 | 0.39             |
| <b>PS * PT<sub>t</sub></b>                  | 33.5 | <b>&lt;0.001</b> | 6.0  | <b>0.005</b>     | 18.8 | <b>&lt;0.001</b> |
| <b>WT<sub>t</sub> * PT<sub>t</sub></b>      | 23.9 | <b>&lt;0.001</b> | 22.2 | <b>&lt;0.001</b> | 0.23 | 0.63             |
| <b>PS * WT<sub>t</sub> * PT<sub>t</sub></b> | 16.1 | <b>&lt;0.001</b> | 3.4  | <b>0.04</b>      | 5.6  | <b>0.006</b>     |

Statistically significant ( $p < 0.05$ ) results are shown in boldface ( $n = 5$ ). PS: planting systems; WT<sub>t</sub>: Water treatments and PT<sub>t</sub>: Phosphorus addition. MBP: microbial biomass phosphorus; MBN: microbial biomass nitrogen and MBC: microbial biomass carbon.

Table S3: Effects of plant systems, water treatments, phosphorus addition and their interaction on microbial community

| Parameters              |          | (PS)              | (WT <sub>t</sub> ) | (PT <sub>t</sub> ) | PS * WT <sub>t</sub> | PS * PT <sub>t</sub> | WT <sub>t</sub> * PT <sub>t</sub> | PS * WT <sub>t</sub> * PT <sub>t</sub> |
|-------------------------|----------|-------------------|--------------------|--------------------|----------------------|----------------------|-----------------------------------|----------------------------------------|
| Total PFLAs             | <i>F</i> | 53.9              | 537.6              | 289.7              | 35.2                 | 116.1                | 1297.3                            | 75.0                                   |
|                         | <i>P</i> | <b>&lt;0.001</b>  | <b>&lt;0.001</b>   | <b>&lt;0.0001</b>  | <b>&lt;0.0001</b>    | <b>&lt;0.0001</b>    | <b>&lt;0.0001</b>                 | <b>&lt;0.0001</b>                      |
| Bacteria PFLAs          | <i>F</i> | 52.4              | 635.5              | 210.2              | 44.4                 | 112.2                | 1037.8                            | 83.3                                   |
|                         | <i>P</i> | <b>&lt;0.0001</b> | <b>&lt;0.0001</b>  | <b>&lt;0.0001</b>  | <b>&lt;0.0001</b>    | <b>&lt;0.0001</b>    | <b>&lt;0.0001</b>                 | <b>&lt;0.0001</b>                      |
| G <sup>-</sup> bacteria | <i>F</i> | 52.1              | 248.1              | 53.3               | 42.6                 | 73.7                 | 520.3                             | 49.4                                   |
|                         | <i>P</i> | <b>&lt;0.0001</b> | <b>&lt;0.0001</b>  | <b>&lt;0.0001</b>  | <b>&lt;0.0001</b>    | <b>&lt;0.0001</b>    | <b>&lt;0.0001</b>                 | <b>&lt;0.0001</b>                      |
| G <sup>+</sup> bacteria | <i>F</i> | 4.8               | 425.3              | 206.0              | 4.6                  | 34.3                 | 508.1                             | 31.0                                   |
|                         | <i>P</i> | <b>0.011</b>      | <b>&lt;0.0001</b>  | <b>&lt;0.0001</b>  | <b>0.01</b>          | <b>&lt;0.0001</b>    | <b>&lt;0.0001</b>                 | <b>&lt;0.0001</b>                      |
| Fungi PFLAs             | <i>F</i> | 20.3              | 71.7               | 63.5               | 1.10                 | 23.6                 | 267.6                             | 9.5                                    |
|                         | <i>P</i> | <b>&lt;0.0001</b> | <b>&lt;0.0001</b>  | <b>&lt;0.0001</b>  | 0.34                 | <b>&lt;0.0001</b>    | <b>&lt;0.0001</b>                 | <b>&lt;0.001</b>                       |
| AMF (16:105c)           | <i>F</i> | 3.8               | 101.0              | 66.3               | 0.7                  | 20.5                 | 217.2                             | 9.4                                    |
|                         | <i>P</i> | <b>0.02</b>       | <b>&lt;0.0001</b>  | <b>&lt;0.0001</b>  | 0.49                 | <b>&lt;0.0001</b>    | <b>&lt;0.0001</b>                 | <b>&lt;0.001</b>                       |
| F: B ratio              | <i>F</i> | 3.6               | 17.2               | 5.5                | 1.7                  | 4.1                  | 4.3                               | 3.5                                    |
|                         | <i>P</i> | 0.3               | 0.1                | 0.2                | 0.35                 | 0.2                  | 0.4                               | 0.3                                    |

Significant *P*-values ( $p < 0.05$ ) shown in bold face type. PT<sub>s</sub>: planting systems; WT<sub>t</sub>: Water treatments and PT<sub>t</sub>: Phosphorus addition.

Table S4: Summary of three-way ANOVA investigating the effects of planting systems, water treatments, phosphorus addition and their interaction on soil enzymes activities

| Effects                                | Alkaline phosphate (ug.g-1.h-1) |                  | $\beta$ -Glucosidase (mg/kg/hr) |                  | urease ( $\mu\text{g N-NH}_4 \text{ g}^{-1} \text{ hr}^{-1}$ ) |                  |
|----------------------------------------|---------------------------------|------------------|---------------------------------|------------------|----------------------------------------------------------------|------------------|
|                                        | F                               | <i>P</i>         | F                               | <i>P</i>         | F                                                              | <i>P</i>         |
| PS                                     | 49.4                            | <b>&lt;0.001</b> | 2.3                             | 0.11             | 3.9                                                            | <b>0.02</b>      |
| WT <sub>t</sub>                        | 1.6                             | 0.20             | 6.6                             | <b>0.01</b>      | 13.6                                                           | <b>0.001</b>     |
| PT <sub>t</sub>                        | 38.3                            | <b>&lt;0.001</b> | 0.83                            | 0.36             | 10.9                                                           | <b>0.002</b>     |
| PS * WT <sub>t</sub>                   | 4.8                             | <b>0.01</b>      | 9.9                             | <b>&lt;0.001</b> | 23.7                                                           | <b>&lt;0.001</b> |
| PS * PT <sub>t</sub>                   | 15.1                            | <b>&lt;0.001</b> | 1.1                             | 0.32             | 17.2                                                           | <b>&lt;0.001</b> |
| WT <sub>s</sub> * PT <sub>t</sub>      | 11.1                            | <b>0.002</b>     | 2.3                             | 0.13             | 22.3                                                           | <b>&lt;0.001</b> |
| PS * WT <sub>t</sub> * PT <sub>t</sub> | 26.7                            | <b>&lt;0.001</b> | 4.2                             | <b>0.02</b>      | 19.7                                                           | <b>&lt;0.001</b> |

Statistically significant ( $p < 0.05$ ) results are shown in boldface ( $n = 5$ ). PS: planting systems; W<sub>t</sub>: Water treatments and P<sub>t</sub>: Phosphorus addition.
